# Supplementary material for: Association Between Lactate-to-Calcium Ratio and 28-Day Mortality in Patients With Sepsis-Induced Myocardial Injury: A Retrospective Cohort Study Based on the MIMIC-IV Database
Source: Research Square preprint supplement (doi:10.21203/rs.3.rs-6788738/v1), 2025-06-16
Supplement: Supplementary file 1 [file 666c9ff21232abb0780cfa05.docx]

**Supplementary materials**

**Table S1. Baseline Information for the Overall Population and Separate Male and Female Populations.**

Table S1. Baseline Information for the Overall Population and Separate Male and Female Populations.

| Variables | Overall  (*n*=1631) | Female  (*n*=671) | Male  (n=960) |
| --- | --- | --- | --- |
|
| Age, y,Mean±SD | 63.62±16.50 | 64.89±15.73 | 62.73±16.97 |
| Vital signs |  |  |  |
| Heart rate, beats/min, Mean±SD | 94.69±22.02 | 94.83±21.89 | 94.60±22.11 |
| Systolic blood pressure, mmHg, Mean±SD | 121.07±27.23 | 120.47±27.52 | 121.48±27.04 |
| Diastolic blood pressure, mmHg, Mean±SD | 68.28±19.57 | 67.17±19.96 | 69.06±19.27 |
| Temperature,℃, Mean±SD | 36.61±1.21 | 36.55±1.24 | 36.65±1.19 |
| Resp rate, beats/min, Mean±SD, M (Q1, Q3) | 21.36±6.42 | 20.00 (17.00, 25.00) | 21.36±6.46 |
| SpO2,％, Mean±SD | 96.59±4.84 | 96.65±4.59 | 96.55±5.01 |
| Scores |  |  |  |
| SIRS, Mean±SD | 3.08±0.84 | 3.12±0.85 | 3.06±0.83 |
| SOFA, M (Q1, Q3) | 8.00 (5.00, 10.00) | 7.00 (5.00, 10.00) | 8.00 (5.00, 11.00) |
| SAPSII, Mean±SD | 47.50±15.29 | 47.51±15.15 | 47.49±15.40 |
| GCS, Mean±SD | 14.87±0.72 | 14.87±0.69 | 14.88±0.73 |
| APSIII, M (Q1, Q3) | 61.00 (47.00, 80.00) | 61.00 (45.00, 80.00) | 61.00 (48.00, 80.00) |
| LODS, M (Q1, Q3) | 7.00 (5.00, 10.00) | 7.00 (5.00, 9.00) | 7.00 (5.00, 10.00) |
| OASIS, Mean±SD | 38.54±8.44 | 38.67±8.20 | 38.45±8.60 |
| Charlson comorbidity index, M (Q1, Q3) | 4.00 (3.00, 6.00) | 5.00 (3.00, 6.00) | 4.00 (3.00, 6.00) |
| Laboratory values on admission |  |  |  |
| Troponin T,ng/mL, M (Q1, Q3) | 0.07 (0.03, 0.18) | 0.07 (0.03, 0.19) | 0.07 (0.04, 0.18) |
| Hemoglobin, g/dL,Mean±SD | 10.81±2.51 | 10.42±2.22 | 11.08±2.66 |
| Platelet,×109,M (Q1, Q3) | 184.00 (118.00, 257.00) | 192.00 (121.00, 271.50) | 180.00 (116.00, 247.00) |
| WBC,×109, M (Q1, Q3) | 12.90 (8.60, 18.75) | 13.50 (9.10, 19.15) | 12.45 (8.30, 18.42) |
| BUN,mg/dL, M (Q1, Q3) | 26.00 (16.00, 45.00) | 24.00 (14.00, 42.00) | 27.00 (17.00, 47.00) |
| Creatinine, mg/dL,M (Q1, Q3) | 1.30 (0.90, 2.40) | 1.20 (0.80, 2.10) | 1.40 (1.00, 2.50) |
| Glucose,mg/dL, M (Q1, Q3) | 143.00 (112.00, 193.00) | 147.00 (118.00, 194.50) | 140.00 (109.00, 191.00) |
| CK-MB,IU/L, M (Q1, Q3) | 6.00 (3.00, 14.00) | 6.00 (3.00, 13.00) | 6.00 (3.00, 16.00) |
| ALT,U/L, M (Q1, Q3) | 37.00 (20.00, 106.00) | 35.00 (19.00, 111.50) | 39.00 (21.00, 104.25) |
| AST,U/L, M (Q1, Q3) | 62.00 (31.50, 182.00) | 59.00 (31.50, 172.50) | 65.00 (31.75, 192.00) |
| Bilirubin total, mg/dL,M (Q1, Q3) | 0.70 (0.40, 1.60) | 0.70 (0.40, 1.50) | 0.70 (0.40, 1.60) |
| Comorbidites, *n* (%) |  |  |  |
| Cerebrovascula |  |  |  |
| No | 1294 (79.34) | 519 (77.35) | 775 (80.73) |
| Yes | 337 (20.66) | 152 (22.65) | 185 (19.27) |
| Chronic pulmonary disease |  |  |  |
| No | 1278 (78.36) | 503 (74.96) | 775 (80.73) |
| Yes | 353 (21.64) | 168 (25.04) | 185 (19.27) |
| Diabetes |  |  |  |
| No | 1172 (71.86) | 494 (73.62) | 678 (70.62) |
| Yes | 459 (28.14) | 177 (26.38) | 282 (29.38) |
| Renal disease |  |  |  |
| No | 1285 (78.79) | 532 (79.28) | 753 (78.44) |
| Yes | 346 (21.21) | 139 (20.72) | 207 (21.56) |
| Malignant cancer |  |  |  |
| No | 1404 (86.08) | 581 (86.59) | 823 (85.73) |
| Yes | 227 (13.92) | 90 (13.41) | 137 (14.27) |
| Severe liver disease |  |  |  |
| No | 1427 (87.49) | 594 (88.52) | 833 (86.77) |
| Yes | 204 (12.51) | 77 (11.48) | 127 (13.23) |
| Outcomes |  |  |  |
| 28-day mortality, *n* (%) |  |  |  |
| Alive | 1016 (62.29) | 413 (61.55) | 603 (62.81) |
| Dead | 615 (37.71) | 258 (38.45) | 357 (37.19) |
| Survival,day, M (Q1, Q3) | 13.12 (4.13, 28.00) | 13.26 (4.02, 28.00) | 13.09 (4.17, 28.00) |
